# Supplementary material for: Surface reconstruction and the effect of Ni-modification on the selective hydrogenation of 1,3-butadiene over Mo2C-based catalysts
Source: Royal Society of Chemistry journal article supplement (doi:10.1039/d0cy00402b), 2020-01-01
Supplement: d0cy00402b1.pdf [file d0cy00402b1.pdf]

## Supporting Information

### Correlating the surface chemical states of molybdenum to butene selectivity in the hydrogenation of 1,3-butadiene over Mo<sub>2</sub>C-based catalysts

Qiuchen Yang, Rui Qiu, Xixi Ma, Ruijun Hou\*, Kening Sun\*

<sup>a</sup> Beijing Key Laboratory for Chemical Power Source and Green Catalysis, School of Chemistry and Chemical Engineering, Beijing Institute of Technology, Beijing, 100081, People's Republic of China

\*Ruijun Hou: [hourj@bit.edu.cn](mailto:hourj@bit.edu.cn)

\*Kening Sun: [sunkn@bit.edu.cn](mailto:sunkn@bit.edu.cn)

#### 1. Figures

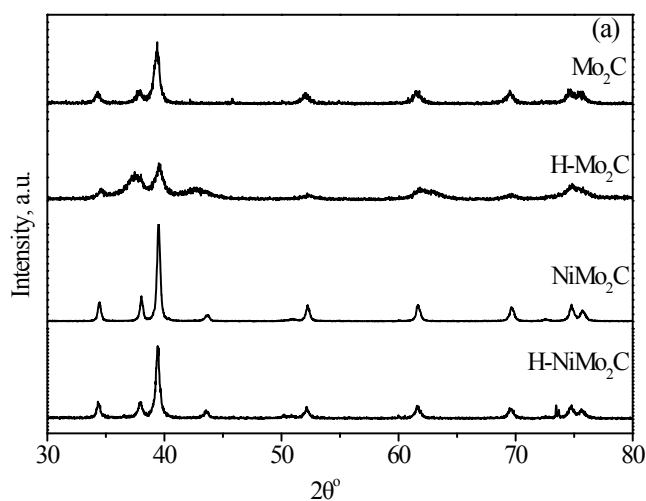

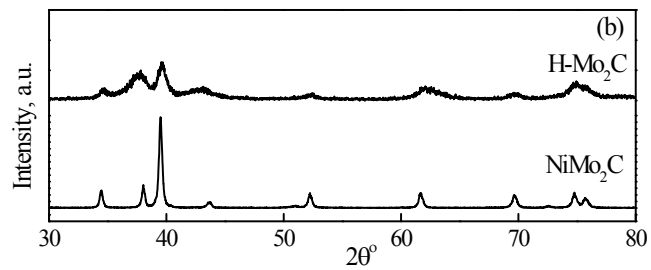

Figure S1. XRD pattern of the (a) regenerated catalysts (b) spent catalysts.

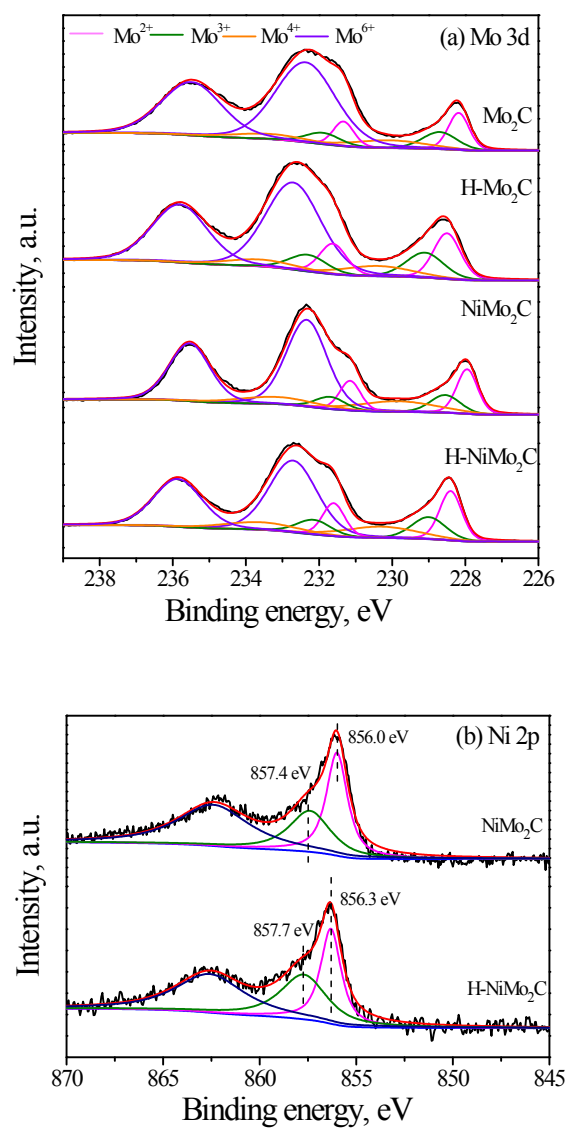

Figure S2. The XPS spectra of (a) Mo 3d and (b) Ni 2p for the as-synthesized catalysts.

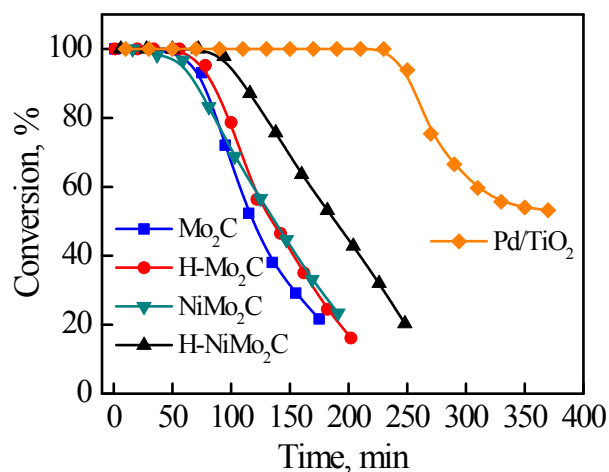

Figure S3. The comparison of TOS-Conversion curve between the Mo<sub>2</sub>C-based catalysts and a benchmark catalyst (0.91 wt%Pd/TiO<sub>2</sub>) at 308 K.

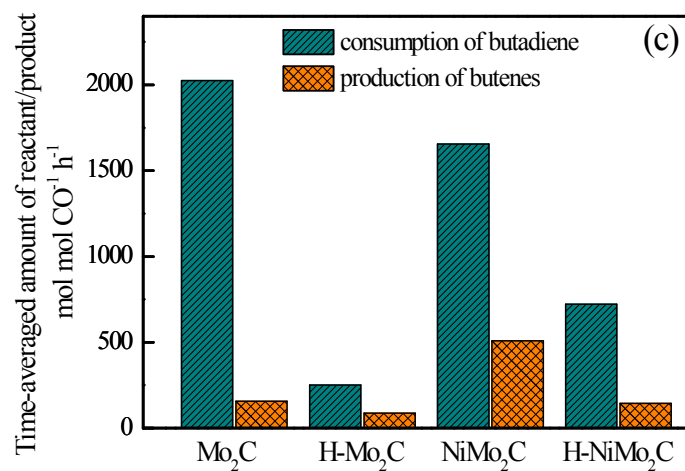

Figure S4. Time-averaged consumption of 1,3-butadiene and time-averaged production of butenes over Mo<sub>2</sub>C, NiMo<sub>2</sub>C, H-NiMo<sub>2</sub>C normalized by CO uptake.

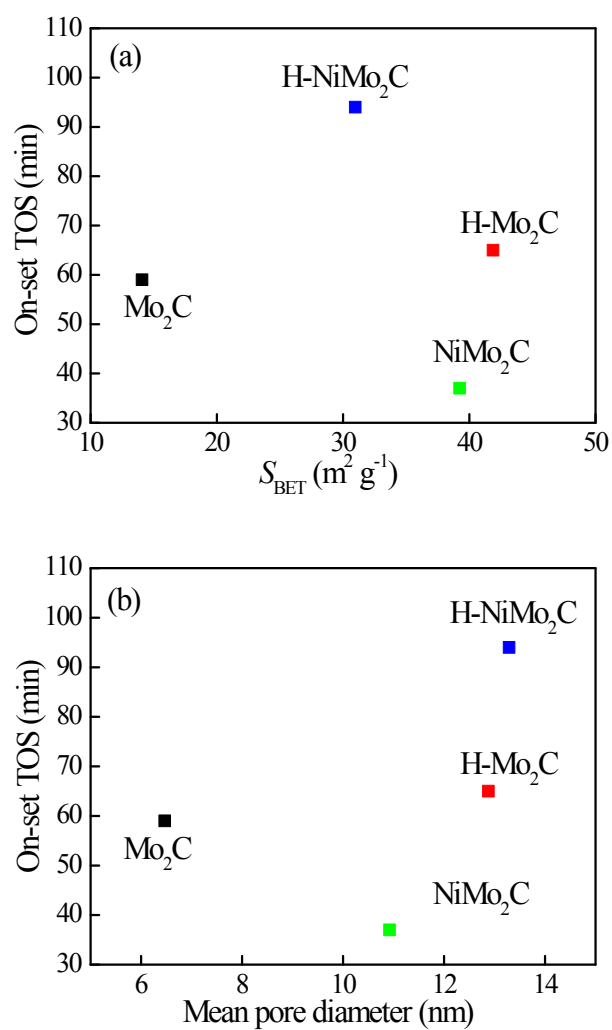

Figure S5. The correlation between the on-set TOS and (a) surface area; (b) mean pore diameter of the catalysts.

## 2. Tables

Table S1. The lattice parameters obtained from XRD data.

| □ Sample              | a (Å)  | b (Å)  | c (Å)  | Volume (Å <sup>3</sup> ) |
|-----------------------|--------|--------|--------|--------------------------|
| Mo <sub>2</sub> C     | 3.0078 | 3.0078 | 4.7378 | 37.120                   |
| NiMo <sub>2</sub> C   | 3.0096 | 3.0096 | 4.7363 | 37.151                   |
| H-NiMo <sub>2</sub> C | 3.0094 | 3.0094 | 4.7389 | 37.168                   |

Table S2. The results of XP spectra for Mo 3d over the as-synthesized catalysts

| Sample                | Mo d <sub>5/2</sub> Binding Energy (eV) |                  |                  |                  | Mo <sup>2+</sup> /Mo <sub>total</sub> | Mo <sup>3+</sup> /Mo <sub>total</sub> | Mo <sup>4+</sup> /Mo <sub>total</sub> | Mo <sup>6+</sup> /Mo <sub>total</sub> |
|-----------------------|-----------------------------------------|------------------|------------------|------------------|---------------------------------------|---------------------------------------|---------------------------------------|---------------------------------------|
|                       | Mo <sup>2+</sup>                        | Mo <sup>3+</sup> | Mo <sup>4+</sup> | Mo <sup>6+</sup> | (%)                                   | (%)                                   | (%)                                   | (%)                                   |
| Mo <sub>2</sub> C     | 228.2                                   | 228.7            | 230.1            | 232.4            | 11.5                                  | 8.8                                   | 8.5                                   | 71.3                                  |
| H-Mo <sub>2</sub> C   | 228.4                                   | 229.0            | 230.4            | 232.7            | 12.0                                  | 16.1                                  | 9.5                                   | 62.3                                  |
| NiMo <sub>2</sub> C   | 228.0                                   | 228.6            | 229.9            | 232.3            | 16.0                                  | 9.1                                   | 14.5                                  | 60.5                                  |
| H-NiMo <sub>2</sub> C | 228.4                                   | 229.0            | 230.3            | 232.7            | 17.9                                  | 12.2                                  | 13.8                                  | 56.0                                  |

Table S3. Surface atomic content of the regenerated catalysts from XP spectra analysis

| Sample(G2)            | Atomic Composition (%) |       |       |      |
|-----------------------|------------------------|-------|-------|------|
|                       | Mo                     | C     | O     | Ni   |
| Mo <sub>2</sub> C     | 19.03                  | 36.11 | 44.86 |      |
| H-Mo <sub>2</sub> C   | 20.26                  | 34.76 | 42.99 |      |
| NiMo <sub>2</sub> C   | 14.74                  | 31.66 | 47.76 | 5.85 |
| H-NiMo <sub>2</sub> C | 11.88                  | 40.73 | 45.32 | 2.06 |

Table S4. Surface atomic content of the as-synthesized catalysts from XP spectra analysis.

| Sample                | Atomic Composition (%) |       |       |      |
|-----------------------|------------------------|-------|-------|------|
|                       | Mo                     | C     | O     | Ni   |
| Mo <sub>2</sub> C     | 13.56                  | 39.78 | 46.67 | --   |
| H-Mo <sub>2</sub> C   | 14.73                  | 39.73 | 45.54 | --   |
| NiMo <sub>2</sub> C   | 7.87                   | 53.05 | 35.76 | 3.32 |
| H-NiMo <sub>2</sub> C | 12.77                  | 38.24 | 45.67 | 3.32 |

Table S5. The mole ratios of Ni/Mo from SEM-EDX and XPS.

| Sample | as-synthesized      |                       | regenerated         |                       |
|--------|---------------------|-----------------------|---------------------|-----------------------|
|        | NiMo <sub>2</sub> C | H-NiMo <sub>2</sub> C | NiMo <sub>2</sub> C | H-NiMo <sub>2</sub> C |
| EDX    | 0.23                | 0.20                  | 0.19                | 0.17                  |
| XPS    | 0.42                | 0.26                  | 0.40                | 0.17                  |

### 3. Details on Data Processing

#### 3.1 Calculation of strain and crystallite size from XRD

The crystallite size and strain were estimated from XRD data by Jade software. The details of the calculation follow the steps of

(i) The width of diffraction peak of half height ( $FW(S)$ ) was measured.

(ii) The  $\frac{\sin(\theta)}{\lambda}$  values were collected as X, and the  $\frac{FW(S) \cdot \cos(\theta)}{\lambda}$  values were collected as Y.

(iii) Least square method was used to fit the plot ( $Y = aX + b$ ), obtaining a straight line with the slope of “a” and the intercept of “b”.

(iv) The crystallite size and the strain were calculated according to Equations (S1) and (S2):

$$\text{Strain (\%)} = 2a \times 100\% \quad (\text{S1})$$

$$\text{Crystallite size} = 1/b \quad (\text{S2})$$

#### 3.2 Calculation of time-averaged consumption of 1,3-butadiene and time-averaged production of butenes

The time-averaged consumption of 1,3-butadiene was calculated according to Equation (S3) based on the curve of “conversion–TOS”:

$$X_R = \frac{F \cdot \int_{t_1}^{t_2} x \cdot dt}{m \cdot (t_2 - t_1)} \quad (\text{S3}),$$

where  $X_R$  is the time-averaged consumption of 1,3-butadiene;  $F$  is the molar flow rate of 1,3-butadiene;  $x$  is the conversion of 1,3-butadiene;  $m$  is the mass of catalyst;  $t$  is the time on stream. The initial reaction time of 0 min was selected as  $t_1$ , and the time corresponding to the conversion of 22% was selected as  $t_2$ . It is noted that when there was no data corresponding to the conversion of 22% directly, interpolation of adjacent values for 22% would be obtained as  $t_2$ .

Similarly, the time-averaged production of butenes was calculated according to Equation (S4) based on the curve of “yield–TOS”:

$$X_p = \frac{F \cdot \int_{t_1}^{t_2} y \cdot dt}{m \cdot (t_2 - t_1)} \quad (\text{S4})$$

where  $X_p$  is the time-averaged amount of products of butenes;  $y$  is the butene yield.

### 3.3 Kinetic analysis of deactivation

In order to understand the deactivation patterns of the catalysts. Simplified kinetic model has been used for Figure 4(c). The reaction rate with deactivation can be written as

$$-r = a(t)(-r_{fresh}) \quad (\text{S5})$$

where  $-r$  is the reaction rate,  $-r_{fresh}$  is the reaction rate of the fresh catalyst,  $a(t)$  is the active factor as a function of time. The reaction rate under steady state without deactivation ( $-r_{fresh}$ ) does not change with time; therefore, the deactivation of conversion in Figure 4(c) corresponds to the active factor ( $a$ ). The active factor can be expressed by a differential equation for the interpretation of deactivation rate:

$$r_d = k_d a^n = -\frac{da}{dt} \quad (\text{S6})$$

where  $r_d$  is the deactivation rate,  $k_d$  is the deactivation rate constant,  $n$  is the deactivation order. The equation could be integrated to  $a(t) = 1 - k_d t$  when  $n=0$ , and to  $a(t) = e^{-k_d t}$  when  $n=1$ , corresponding to a linear deactivation pattern and an exponential deactivation pattern. The 0 order deactivation could be applied to the Ni-modified catalysts, and the 1<sup>st</sup> order deactivation could be applied to the non-modified catalysts. The regressed deactivation rate constants ( $k_d$ ) are summarized in Table S6.

Table S6. Regressed deactivation rate constants ( $k_d$ )

|                                | Deactivation model                 | TPC     | HA-TPC  |
|--------------------------------|------------------------------------|---------|---------|
|                                | 1 <sup>st</sup> order,             |         |         |
| Non-modified Mo <sub>2</sub> C | $-r = e^{-k_d t} a(t)(-r_{fresh})$ | 0.01442 | 0.01191 |
|                                | 0 order                            |         |         |
| Ni-modified Mo <sub>2</sub> C  | $-r = (1 - k_d t)(-r_{fresh})$     | 0.00559 | 0.00502 |
